# Supplementary material for: Impact of pre-meal immersion on multi-scale structural changes and starch digestibility of cooked dried noodles
Source: Royal Society of Chemistry journal article supplement (doi:10.1039/d3fo04289h), 2024-01-01

**Table S1 Drying parameters of dried noodles**

| Drying stage    | Time<br>(min) | Temperature<br>(°C) | Relative humidity<br>(%) |
|-----------------|---------------|---------------------|--------------------------|
| Pre-drying      | 40            | 30                  | 80                       |
| Main drying     | 60            | 35                  | 90                       |
|                 | 150           | 45                  | 80                       |
| Complete drying | 50            | 30                  | 60                       |

**Fig. S1 Microstructure of cooked noodles during immersion**

Note: A, B, and C are the microstructure of cross-section the control, MGDN, and HGDN, respectively.

**Fig. S1**

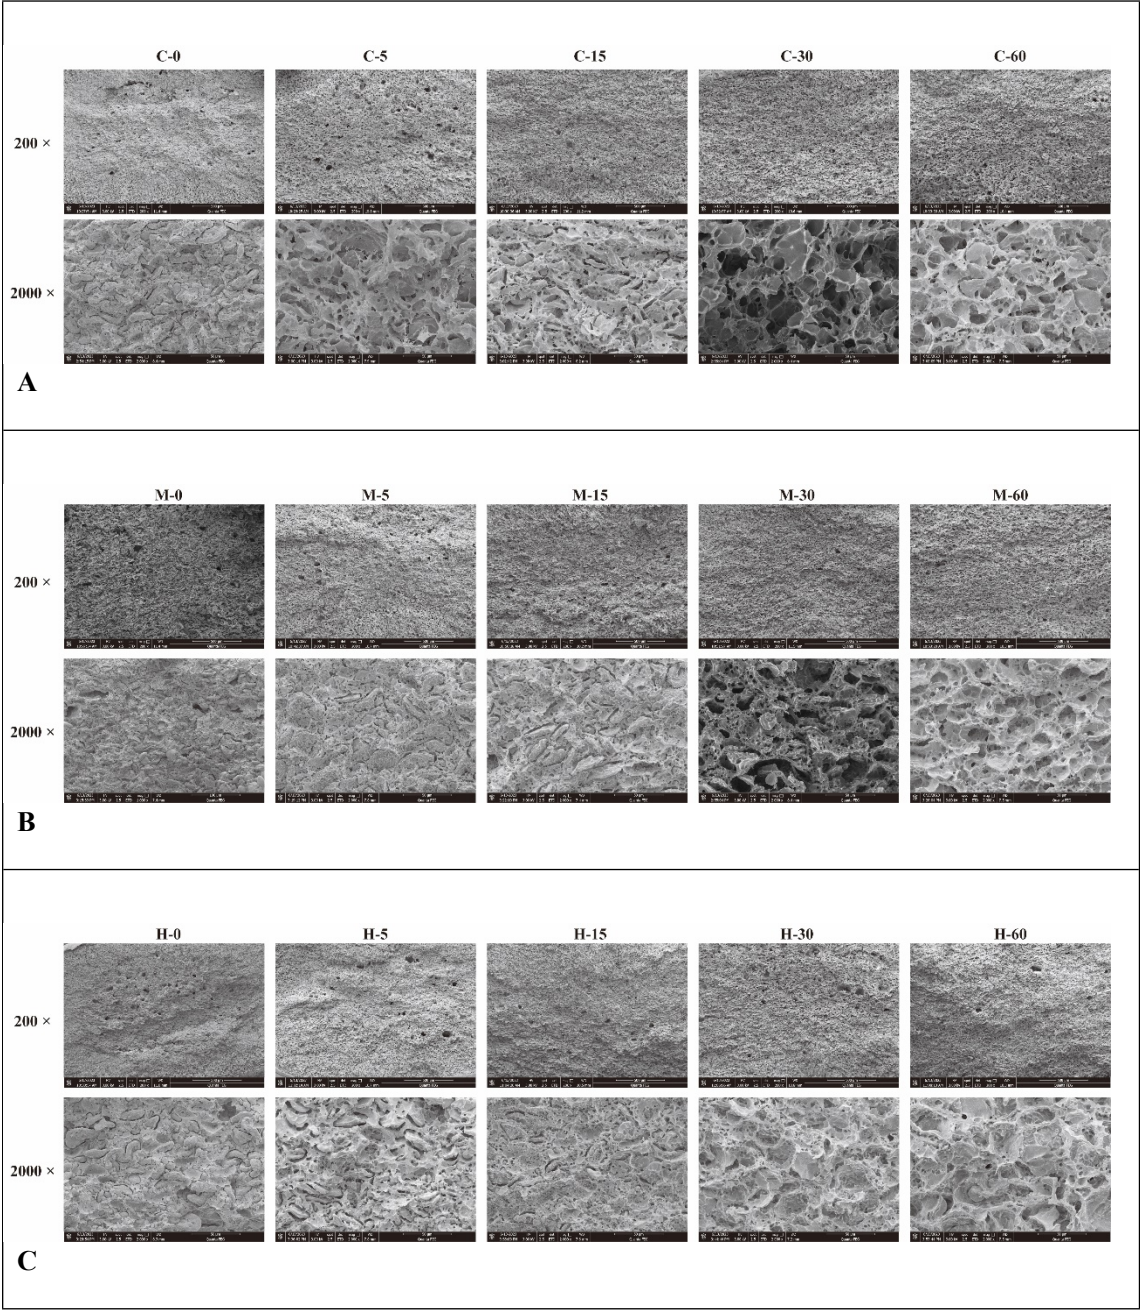

Supplement: d3fo04289h1.pdf [file d3fo04289h1.pdf]
